# Supplementary material
Source: PubMed Central journal article supplement (PMC3612397)
Supplement: NIHMS443689-supplement-1_si_001.pdf [file NIHMS443689-supplement-1_si_001.pdf]

## Supporting Information

### **Nano-Encrypted Morse Code: A Versatile Approach to Programmable and Reversible Nanoscale Assembly and Disassembly**

Ngo Yin Wong, Hang Xing, Li Huey Tan, Yi Lu\*

*Department of Materials Science and Engineering, Department of Chemistry,  
and Beckman Institute for Advanced Science and Technology, University of  
Illinois at Urbana-Champaign, Urbana, IL 61801*

#### **1. Experimental**

##### 1.1 Chemicals and Materials

All Oligonucleotides used in the current study were purchased from Integrated DNA Technologies (Coralville, IA). M13 viral DNA was purchased from New England Biolabs, Inc. (#N4040S, NEB). Tributylphosphine solution (200 mM, in N-methyl-2-pyrrolidinone; Sigma-Aldrich), Desthiobiotin polyethyleneoxide Iodoacetamide (>90%, Sigma-Aldrich), Avidin agarose (6% beaded agarose, Thermo Scientific) Amicon centrifugal filter units (100,000 MWCO, Millipore). All buffer components were purchased from Sigma Aldrich unless otherwise noted.

## 1.2 Origami Design<sup>1,2</sup>

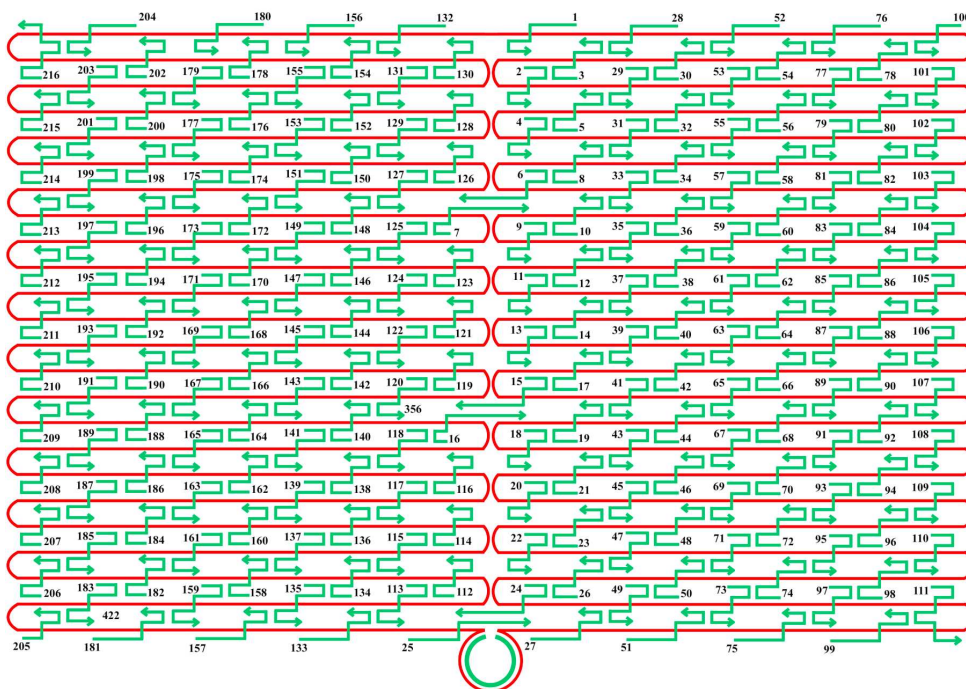

| Sequence Name | Sequence                           |
|---------------|------------------------------------|
| 1             | CAAGCCCAATAGGAAC CCATGTACAAACAGTT  |
| 2             | AATGCCCCGTAACAGT GCCCGTATCTCCCTCA  |
| 3             | TGCCTTGACTGCCTAT TTCGGAACAGGGATAG  |
| 4             | GAGCCGCCCCACCACC GGAACCGCGACGGAAA  |
| 5             | AACCAGAGACCCTCAG AACCGCCAGGGGTCAG  |
| 6             | TTATTCATAGGGAAGG TAAATATT CATTCACT |
| 7             | CATAACCCGAGGCATA GTAAGAGC TTTTAAAG |
| 8             | ATTGAGGGTAAAGGTG AATTATCAATCACCGG  |
| 9             | AAAAGTAATATCTTAC CGAAGCCCTTCCAGAG  |
| 10            | GCAATAGCGCAGATAG CCGAACAAATCAACCG  |
| 11            | CCTAATTTACGCTAAC GAGCGTCTAATCAATA  |
| 12            | TCTTACCAGCCAGTTA CAAAATAAATGAAATA  |
| 13            | ATCGGCTGCGAGCATG TAGAAACCTATCATAT  |
| 14            | CTAATTTATCTTTCCT TATCATTATCCTGAA   |
| 15            | GCGTTATAGAAAAAGC CTGTTTAG AAGGCCGG |
| 16            | GCTCATTTTCGCATTA AATTTTTG AGCTTAGA |
| 17            | AATACTACAAATTCT TACCAGTAATCCCATC   |
| 18            | TTAAGACGTTGAAAAC ATAGCGATAACAGTAC  |
| 19            | TAGAATCCCTGAGAAG AGTCAATAGGAATCAT  |
| 20            | CTTTACACAGATGAA TATACAGTAAACAATT   |

|    |                                    |
|----|------------------------------------|
| 21 | TTTAACGTTTCGGGAGA AACATAATTTCCCT   |
| 22 | CGACAATAAGTATTA GACTTTACAATACCGA   |
| 23 | GGATTTAGCGTATTA ATCCTTTGTTTTCAGG   |
| 24 | ACGAACCAAAACATCG CCATTAAT TGGTGGTT |
| 25 | GAACGTGGCGAGAAAG GAAGGGAA CAACTAT  |
| 26 | TAGCCCTACCAGCAGA AGATAAAAACATTTGA  |
| 27 | CGGCCTTGCTGGTAAT ATCCAGAACGAACTGA  |
| 28 | CTCAGAGCCACCACCC TCATTTTCCTATTATT  |
| 29 | CTGAAACAGGTAATAA GTTTTAACCCCTCAGA  |
| 30 | AGTGTACTTGAAAGTA TTAAGAGGCCGCCACC  |
| 31 | GCCACCACTCTTTTCA TAATCAAACCGTCACC  |
| 32 | GTTTGCCACCTCAGAG CCGCCACCGATACAGG  |
| 33 | GACTTGAGAGACAAAA GGGCGACAAGTTACCA  |
| 34 | AGCGCCAACCATTTGG GAATTAGATTATTAGC  |
| 35 | GAAGGAAAATAAGAGC AAGAAACAACAGCCAT  |
| 36 | GCCCAATACCGAGGAA ACGCAATAGGTTTACC  |
| 37 | ATTATTTAACCCAGCT ACAATTTTCAAGAACG  |
| 38 | TATTTTGCTCCCAATC CAAATAAGTGAGTTAA  |
| 39 | GGTATTAAGAACAAGA AAAATAATTAAGCCA   |
| 40 | TAAGTCCTACCAAGTA CCGCACTCTTAGTTGC  |
| 41 | ACGCTCAAATAAGAA TAAACACCGTGAATTT   |
| 42 | AGGCGTTACAGTAGGG CTTAATTGACAATAGA  |
| 43 | ATCAAATCGTCGCTA TTAATTAACGGATTTCG  |
| 44 | CTGTAAATCATAGGTC TGAGAGACGATAAATA  |
| 45 | CCTGATTGAAAGAAAT TGCGTAGACCCGAACG  |
| 46 | ACAGAAATCTTTGAAT ACCAAGTTCCTTGCTT  |
| 47 | TTATTAATGCCGTCAA TAGATAATCAGAGGTG  |
| 48 | AGATTAGATTTAAAAG TTTGAGTACACGTAAT  |
| 49 | AGGCGGTCATTAGTCT TTAATGCGCAATATTA  |
| 50 | GAATGGCTAGTATTA CACCGCCTCAACTAAT   |
| 51 | CCGCCAGCCATTGCAA CAGGAAAAATATTTTT  |
| 52 | CCCTCAGAACCGCCAC CCTCAGAACTGAGACT  |
| 53 | CCTCAAGAATACATGG CTTTTGATAGAACCAC  |
| 54 | TAAGCGTCGAAGGATT AGGATTAGTACCGCCA  |
| 55 | CACCAGAGTTCGGTCA TAGCCCCCGCCAGCAA  |
| 56 | TCGGCATTCCGCCGCC AGCATTGACGTTCCAG  |
| 57 | AATCACCAAATAGAAA ATTCATATATAACGGA  |
| 58 | TCACAATCGTAGCACC ATTACCATCGTTTTCA  |
| 59 | ATACCCAAGATAACCC ACAAGAATAAACGATT  |
| 60 | ATCAGAGAAAGAACTG GCATGATTTTATTTTG  |
| 61 | TTTTGTTAAGCCTTA AATCAAGAATCGAGAA   |

|     |                                         |
|-----|-----------------------------------------|
| 62  | AGGTTTTGAACGTCAA AAATGAAAGCGCTAAT       |
| 63  | CAAGCAAGACGCGCCT GTTTATCAAGAATCGC       |
| 64  | AATGCAGACCGTTTTT ATTTTCATCTTGCGGG       |
| 65  | CATATTTAGAAATACC GACCGTGTTACCTTTT       |
| 66  | AATGGTTTACAACGCC AACATGTAGTTCAGCT       |
| 67  | TAACCTCCATATGTGA GTGAATAAACAAAATC       |
| 68  | AAATCAATGGCTTAGG TTGGGTTACTAAATTT       |
| 69  | GCGCAGAGATATCAAA ATTATTTGACATTATC       |
| 70  | AACCTACCGCGAATTA TTCATTTCCAGTACAT       |
| 71  | ATTTTGCGTCTTTAGG AGCACTAAGCAACAGT       |
| 72  | CTAAAATAGAACAAAG AAACCACCAGGGTTAG       |
| 73  | GCCACGCTATACGTGG CACAGACAACGCTCAT       |
| 74  | GCGTAAGAGAGAGCCA GCAGCAAAAAGGTTAT       |
| 75  | GGAAATACCTACATTT TGACGCTCACCTGAAA       |
| 76  | TATCACCGTACTCAGG AGGTTTAGCGGGGTTT       |
| 77  | TGCTCAGTCAGTCTCT GAATTTACCAGGAGGT       |
| 78  | GGAAAGCGACCAGGCG GATAAGTGAATAGGTG       |
| 79  | TGAGGCAGGCGTCAGA CTGTAGCGTAGCAAGG       |
| 80  | TGCCTTAGTCAGACG ATTGGCCTGCCAGAAT        |
| 81  | CCGGAAACACACCACG GAATAAGTAAGACTCC       |
| 82  | ACGCAAAGGTCACCAA TGAAACCAATCAAGTT       |
| 83  | TTATTACGGTCAGAGG GTAATTGAATAGCAGC       |
| 84  | TGAACAAACAGTATGT TAGCAAATAAAAGAA        |
| 85  | CTTTACAGTTAGCGAA CCTCCGACGTAGGAA        |
| 86  | GAGGCGTTAGAGAATA ACATAAAAGAACACCC       |
| 87  | TCATTACCCGACAATA AACAACATATTTAGGC       |
| 88  | CCAGACGAGCGCCCAA TAGCAAGCAAGAACGC       |
| 89  | AGAGGCATAATTTTCTTCTGACTATAACTA          |
| 90  | TTTTAGTTTTTCGAGC CAGTAATAAATTCTGT       |
| 91  | TATGTAAACCTTTTTT AATGGAAAAATTACCT       |
| 92  | TTGAATTATGCTGATG CAAATCCACAAATATA       |
| 93  | GAGCAAAAACCTTCTGA ATAATGGAAGAAGGAG      |
| 94  | TGGATTATGAAGATGA TGAAACAAAATTTTCT       |
| 95  | CGGAATTATTGAAAGG AATTGAGGTGAAAAAT       |
| 96  | ATCAACAGTCATCATA TTCCTGATTGATTGTT       |
| 97  | CTAAAGCAAGATAGAA CCCTTCTGAATCGTCT       |
| 98  | GCCAACAGTCACCTTG CTGAACCTGTTGGCAA       |
| 99  | GAAATGGATTATTTAC ATTGGCAGACATTCTG       |
| 100 | TTTT TATAAGTA TAGCCCGGCCGTCGAG          |
| 101 | AGGGTTGA TTTT ATAAATCC TCATTAAATGATATTC |
| 102 | ACAAACAA TTTT AATCAGTA GCGACAGATCGATAGC |

|     |                                                         |
|-----|---------------------------------------------------------|
| 103 | AGCACCGT TTTT TAAAGGTG GCAACATAGTAGAAAA                 |
| 104 | TACATACA TTTT GACGGGAG AATTAACACAGGGAA                  |
| 105 | GCGCATT TTTT GCTTATCC GGTATTCTAAATCAGA                  |
| 106 | TATAGAAG TTTT CGACAAAA GTTAAAGTAGAGAATA                 |
| 107 | TAAAGTAC TTTT CGCGAGAA AACTTTTTATCGCAAG                 |
| 108 | ACAAAGAA TTTT ATTAATTA CATTTAACACATCAAG                 |
| 109 | AAAACAAA TTTT TTCATCAA TATAATCCTATCAGAT                 |
| 110 | GATGGCAA TTTT AATCAATA TCTGGTCACAAATATC                 |
| 111 | AAACCCTC TTTT ACCAGTAA TAAAAGGGATTACCA GTCACACG<br>TTTT |
| 112 | CCGAAATCCGAAAATC CTGTTTGAAGCCGGAA                       |
| 113 | CCAGCAGGGGCAAAT CCCTTATAAAGCCGGC                        |
| 114 | GCATAAAGTTCCACAC AACATACGAAGCGCCA                       |
| 115 | GCTCACAATGTAAAGC CTGGGGTGGGTTTGCC                       |
| 116 | TTCGCCATTGCCGGAA ACCAGGCATTAATCA                        |
| 117 | GCTTCTGGTCAGGCTG CGCAACTGTGTTATCC                       |
| 118 | GTTAAAATTTTAACCA ATAGGAACCCGGCACC                       |
| 119 | AGACAGTCATTCAAAA GGGTGAGAAGCTATAT                       |
| 120 | AGGTAAAGAAATCACC ATCAATATAATATTTT                       |
| 121 | TTTCATTTGGTCAATA ACCTGTTTATATCGCG                       |
| 122 | TCGCAAATGGGGCGCG AGCTGAAATAATGTGT                       |
| 123 | TTTTAATTGCCCGAAA GACTTCAAAACACTAT                       |
| 124 | AAGAGGAACGAGCTTC AAAGCGAAGATACATT                       |
| 125 | GGAATTAICTGTTTAC CAGACGACAAAAGATT                       |
| 126 | GAATAAGGACGTAACA AAGCTGCTCTAAAACA                       |
| 127 | CCAATCACTTGCCCT GACGAGAACGCCAAAA                        |
| 128 | CTCATCTTGAGGCAAA AGAATACAGTGAATTT                       |
| 129 | AAACGAAATGACCCCC AGCGATTATTCATTAC                       |
| 130 | CTTAAACATCAGCTTG CTTTCGAGCGTAACAC                       |
| 131 | TCGGTTTAGCTTGATA CCGATAGTCCAACCTA                       |
| 132 | TGAGTTTCGTCACCAG TACAACTTAATTGTA                        |
| 133 | CCCCGATTTAGAGCTT GACGGGGAAATCAAAA                       |
| 134 | GAATAGCCGCAAGCGG TCCACGCTCCTAATGA                       |
| 135 | GAGTTGCACGAGATAG GGTTGAGTAAGGGAGC                       |
| 136 | GTGAGCTAGTTTCTG TGTGAAATTTGGGAAG                        |
| 137 | TCATAGCTACTACAT TAATTGCGCCCTGAGA                        |
| 138 | GGCGATCGCACTCCAG CCAGCTTTGCCATCAA                       |
| 139 | GAAGATCGGTGCGGGC CTCTTCGCAATCATGG                       |
| 140 | AAATAATTTTAAATTG TAAACGTTGATATTCA                       |
| 141 | GCAAATATCGCGTCTG GCCTTCCTGGCCTCAG                       |
| 142 | ACCGTTCTAAATGCAA TGCCTGAGAGGTGGCA                       |
| 143 | TATATTTTAGCTGATA AATTAATGTTGTATAA                       |

|     |                                    |
|-----|------------------------------------|
| 144 | TCAATTCTTTTAGTTT GACCATTACCAGACCG  |
| 145 | CGAGTAGAACTAATAG TAGTAGCAAACCTCA   |
| 146 | GAAGCAAAAAAGCGGA TTGCATCAGATAAAAA  |
| 147 | TCAGAAGCCTCCAACA GGTCAGGATCTGCGAA  |
| 148 | CCAAAATATAATGCAG ATACATAAACACCAGA  |
| 149 | CATTCAACGCGAGAGG CTTTTGCATATTATAG  |
| 150 | ACGAGTAGTGACAAGA ACCGGATATACCAAGC  |
| 151 | AGTAATCTTAAATTGG GCTTGAGAGAATACCA  |
| 152 | GCGAAACATGCCACTA CGAAGGCATGCGCCGA  |
| 153 | ATACGTAAAAGTACAA CGGAGATTTTCATCAAG |
| 154 | CAATGACACTCCAAAA GGAGCCTTACAACGCC  |
| 155 | AAAAAAGGACAACCAT CGCCCACGCGGGTAAA  |
| 156 | TGTAGCATTCCACAGA CAGCCCTCATCTCCAA  |
| 157 | GTAAGCACTAAATCG GAACCCTAGTTGTTCC   |
| 158 | AGTTTGGAGCCCTTCA CCGCCTGGTTGCGCTC  |
| 159 | AGCTGATTACAAGAGT CCACTATTGAGGTGCC  |
| 160 | ACTGCCCGCCGAGCTC GAATTCGTTATTACGC  |
| 161 | CCCGGGTACTTTCCAG TCGGGAAACGGGCAAC  |
| 162 | CAGCTGGCGGACGACG ACAGTATCGTAGCCAG  |
| 163 | GTTTGAGGGAAAGGGG GATGTGCTAGAGGATC  |
| 164 | CTTTCATCCCCAAAAA CAGGAAGACCGGAGAG  |
| 165 | AGAAAAGCAACATTAA ATGTGAGCATCTGCCA  |
| 166 | GGTAGCTAGGATAAAA ATTTTTAGTTAACATC  |
| 167 | CAACGCAATTTTTGAG AGATCTACTGATAATC  |
| 168 | CAATAAATACAGTTGA TTCCCAATTTAGAGAG  |
| 169 | TCCATATACATACAGG CAAGGCAACTTTATTT  |
| 170 | TACCTTTAAGGTCTTT ACCCTGACAAAGAAGT  |
| 171 | CAAAAATCATTGCTCC TTTTGATAAGTTTCAT  |
| 172 | TTTGCCAGATCAGTTG AGATTTAGTGTTTAA   |
| 173 | AAAGATTCAGGGGGTA ATAGTAAACCATAAAT  |
| 174 | TTTCAACTATAGGCTG GCTGACCTTGTATCAT  |
| 175 | CCAGGCGCTTAATCAT TGTGAATTACAGGTAG  |
| 176 | CGCCTGATGGAAGTTT CCATTAACATAACCG   |
| 177 | TTTCATGAAAATTGTG TCGAAATCTGTACAGA  |
| 178 | ATATATTCTTTTTTCA CGTTGAAAATAGTTAG  |
| 179 | AATAATAAGGTCGCTG AGGCTTGCAAAGACTT  |
| 180 | CGTAACGATCTAAAGT TTTGTCGTGAATTGCG  |
| 181 | ACCCAAATCAAGTTTT TTGGGGTCAAAGAACG  |
| 182 | TGGACTCCTTTTTCAC CAGTGAGACCTGTCGT  |
| 183 | TGGTTTTTAACGTCAA AGGGCGAAGAACCATC  |
| 184 | GCCAGCTGCCTGCAGG TCGACTCTGCAAGGCG  |

|       |                                                         |
|-------|---------------------------------------------------------|
| 185   | CTTGCATGCATTAATG AATCGGCCCGCCAGGG                       |
| 186   | ATTAAGTTCGCATCGT AACCGTGCAGTAACA                        |
| 187   | TAGATGGGGGGTAACG CCAGGGTTGTGCCAAG                       |
| 188   | ACCCGTCGTCATATGT ACCCCGGTAAAGGCTA                       |
| 189   | CATGTCAAGATTCTCC GTGGGAACCGTTGGTG                       |
| 190   | TCAGGTCACITTTGCG GGAGAAGCAGAATTAG                       |
| 191   | CTGTAATATTGCCTGA GAGTCTGGAAAAGTAG                       |
| 192   | CAAAATTAAGTACGG TGTCTGGAAGAGGTCA                        |
| 193   | TGCAACTAAGCAATAA AGCCTCAGTTATGACC                       |
| 194   | TTTTTGCAGAAAAC GAGAATGAATGTTTAG                         |
| 195   | AAACAGTTGATGGCTT AGAGCTTATTTAAATA                       |
| 196   | ACTGGATAACGGAACA ACATTATTACCTTATG                       |
| 197   | ACGAACTAGCGTCCAA TACTGCGGAATGCTTT                       |
| 198   | CGATTTTAGAGGACAG ATGAACGGCGGACCT                        |
| 199   | CTTTGAAAAGAACTGG CTCATTATTTAATAAA                       |
| 200   | GCTCCATGAGAGGCTT TGAGGACTAGGGAGTT                       |
| 201   | ACGGCTACTTACTTAG CCGGAACGCTGACCAA                       |
| 202   | AAAGGCCGAAAGGAAC AACTAAAGCTTCCAG                        |
| 203   | GAGAATAGCTTTTGC GGATCGTCGGGTAGCA                        |
| 204   | ACGTTAGTAAATGAAT TTTCTGTAAGCGGAGT                       |
| 205   | TTTT CGATGGCC CACTACGTAAACCGTC                          |
| 206   | TATCAGGG TTTT CGGTTTGC GTATTGGGAACGCGCG                 |
| 207   | GGGAGAGG TTTT TGTA AAC GACGGCCATTCCCAGT                 |
| 208   | CACGACGT TTTT GTAATGGG ATAGGTCAAACGGCG                  |
| 209   | GATTGACC TTTT GATGAACG GTAATCGTAGCAAACA                 |
| 210   | AGAGAATC TTTT GGTTGTAC CAAAAACAAGCATAAA                 |
| 211   | GCTAAATC TTTT CTGTAGCT CAACATGTATTGCTGA                 |
| 212   | ATATAATG TTTT CATTGAAT CCCCCTCAAATCGTCA                 |
| 213   | TAAATATT TTTT GGAAGAAA AATCTACGACCAGTCA                 |
| 214   | GGACGTTG TTTT TCATAAGG GAACCGAAAGGCGCAG                 |
| 215   | ACGGTCAA TTTT GACAGCAT CGGAACGAACCCTCAG                 |
| 216   | CAGCGAAAA TTTT ACTTTCA ACAGTTTCTGGGATTTTGCTAAAC<br>TTTT |
| Loop1 | AACATCACTTGCCTGAGTAGAAGAACT                             |
| Loop2 | TGTAGCAATACTTCTTTGATTAGTAAT                             |
| Loop3 | AGTCTGTCCATCACGCAAATTAACCGT                             |
| Loop4 | ATAATCAGTGAGGCCACCGAGTAAAAG                             |
| Loop5 | ACGCCAGAATCCTGAGAAGTGTTTTT                              |
| Loop6 | TTAAAGGGATTTTAGACAGGAACGGT                              |
| Loop7 | AGAGCGGGAGCTAAACAGGAGGCCGA                              |
| Loop8 | TATAACGTGCTTTCCTCGTTAGAATC                              |
| Loop9 | GTAATATGGTTGCTTTGACGAGCACG                              |

|        |                            |
|--------|----------------------------|
| Loop10 | GCGCTTAATGCGCCGCTACAGGGCGC |
|--------|----------------------------|

### 1.3 DNA Sequences (Morse Code)

Thiol modified sequences:

| Sequence Name | Sequence (5'-3')                   |
|---------------|------------------------------------|
| HS-16         | GCTCATTTTCGCATTA AATTTTGT AGCTTAGA |
| HS-32         | GTTTGCCACCTCAGAG CCGCCACCGATACAGG  |
| HS-38         | TATTTTGCTCCCAATC CAAATAAGTGAGTTAA  |
| HS-44         | CTGTAAATCATAGGTC TGAGAGACGATAAATA  |
| HS-56         | TCGGCATTCCGCCGCC AGCATTGACGTTCCAG  |
| HS-62         | AGGTTTTGAACGTCAA AAATGAAAGCGCTAAT  |
| HS-68         | AAATCAATGGCTTAGG TTGGGTTACTAAATTT  |
| HS-128        | CTCATCTTGAGGCAAA AGAATACAGTGAATTT  |
| HS-194        | TTTTTGCGCAGAAAAC GAGAATGAATGTTTAG  |

Biotin modified sequences –

| Sequence Name | Sequence (5'-3')                        |
|---------------|-----------------------------------------|
| Bio-50        | GAATGGCTAGTATTA CACCGCCTCAACTAAT        |
| Bio-74        | GCGTAAGAGAGAGCCA GCAGCAAAAAGGTTAT       |
| Bio-112       | CCGAAATCCGAAAATC CTGTTTGAAGCCGGAA       |
| Bio-123       | TTTTAATTGCCGAAA GACTTCAAAACACTAT        |
| Bio-134       | GAATAGCCGCAAGCGG TCCACGCTCCTAATGA       |
| Bio-140       | AAATAATTTTAAATTG TAAACGTTGATATTCA       |
| Bio-146       | GAAGCAAAAAGCGGA TTGCATCAGATAAAAA        |
| Bio-152       | GCGAAACATGCCACTA CGAAGGCATGCGCCGA       |
| Bio-182       | TGGACTCCCTTTTAC CAGTGAGACCTGTCGT        |
| Bio-188       | ACCCGTCGTCATATGT ACCCCGGTAAAGGCTA       |
| Bio-200       | GCTCCATGAGAGGCTT TGAGGACTAGGGAGTT       |
| Bio-206       | TATCAGGG TTTT CGGTTTGC GTATTGGGAACGCGCG |
| Bio-209       | GATTGACC TTTT GATGAACG GTAATCGTAGCAAACA |
| Bio-212       | ATATAATG TTTT CATTGAAT CCCCCTCAAATCGTCA |
| Bio-215       | ACGGTCAA TTTT GACAGCAT CGGAACGAACCCTCAG |



## DNA Sequences (Big I)

Biotin modified sequences:

| Sequence Name | Sequence (5'-3')                   |
|---------------|------------------------------------|
| Bio-14        | CTAATTTATCTTTCCT TATCATTTCATCCTGAA |
| Bio-37        | ATTATTTAACCCAGCT ACAATTTTCAAGAACG  |
| Bio-40        | TAAGTCCTACCAAGTA CCGCACTCTTAGTTGC  |
| Bio-59        | ATACCCAAGATAACCC ACAAGAATAAACGATT  |
| Bio-61        | TTTTGTTTAAGCCTTA AATCAAGAATCGAGAA  |
| Bio-124       | AAGAGGAACGAGCTTC AAAGCGAAGATACATT  |
| Bio-144       | TCAATTCTTTTAGTTT GACCATTACCAGACCG  |

Thiol modified sequences:

| Sequence Name | Sequence (5'-3')                  |
|---------------|-----------------------------------|
| HS-11         | CCTAATTTACGCTAAC GAGCGTCTAATCAATA |
| HS-57         | AATCACCAATAGAAA ATTCATATATAACGGA  |
| HS-63         | CAAGCAAGACGCGCCT GTTTATCAAGAATCGC |
| HS-65         | CATATTTAGAAATACC GACCGTGTTACCTTTT |
| HS-121        | TTTCATTTGGTCAATA ACCTGTTTATATCGCG |
| HS-147        | TCAGAAGCCTCCAACA GGTCAGGATCTGCGAA |
| HS-164        | CTTTCATCCCCAAAAA CAGGAAGACCGGAGAG |
| HS-166        | GGTAGCTAGGATAAAA ATTTTTAGTTAACATC |
| HS-168        | CAATAAATACAGTTGA TTCCAATTTAGAGAG  |
| HS-170        | TACCTTTAAGGTCTTT ACCCTGACAAAGAAGT |
| HS-172        | TTTGCCAGATCAGTTG AGATTTAGTGTTTAA  |

### 1.3 Desthiobiotin modification of thiol-DNA

The concentration of DNA was calculated based on absorption at 280 nm according to the Beer-Lambert law. and adjusted to 100  $\mu$ M. A 10  $\mu$ M solution of 5' thiol modified DNA (used as received from IDT) was incubated with 2  $\mu$ L of tributylphosphine solution for 2 hours at room temperature to reduce the disulfide bond. Next, a 35 mM solution of desthiobiotin polyethyleneoxide iodoacetamide was freshly prepared in a 1 x TAE-Mg<sup>2+</sup> buffer (Tris, 40 mM; acetic acid, 20 mM; EDTA, 2 mM; and magnesium acetate, 12.5 mM;

pH 8.0) and incubated for 5 hours at 50 °C. Excess linkers were removed by washing 10 times with water using a 30 MWCO Amicon centrifugal filter. To purify the desthiobiotin functionalized product, the washed and concentrated solution was incubated with avidin agarose beads and eluted following manufacturers suggested protocols.

#### 1.4 Non-denaturing PAGE

Gels containing 4% polyacrylamide (19:1 acrylamide/ bisacrylamide) were run on an Owl Adj2 electrophoresis unit at 4 °C (4 W, constant wattage). The running buffer was 1x TAE-Mg<sup>2+</sup> buffer. After electrophoresis, the gels were stained with ethidium bromide (Sigma) and imaged under UV illumination. DNA recovery was done by cutting and soaking gel pieces with 1x TAE-Mg<sup>2+</sup> buffer for 12 hours at 4 °C.

#### 1.5 Design and assembly of DNA origami

Rectangular origami tiles were formed according to Rothemund's paper with a ratio of 1:20 between viral DNA and both modified and unmodified staple strands. A concentration of 10 nM viral DNA was used in this work. Helper strands were mixed to form a master mix (50 μM) that was added to the viral DNA sequence in 1x TAE-Mg<sup>2+</sup> buffer and annealed from 90 °C to 20 °C over 3 hours. After assembly of the origami tiles, they were washed 3x with 1x TAE-Mg<sup>2+</sup> and concentrated using Amicon centrifugal filter units (100 MWCO, 300 x g speed, 10 min).

#### 1.6 Conjugation of proteins to DNA origami template

To demonstrate selective release of protein from origami template, the protein decorated tiles were diluted to 1 mL and dialyzed overnight in a 300,000 MWCO membrane to remove the large excess of streptavidin that was necessary to prevent aggregation in the previous incubation step. The sample is then treated with 3 mM of biotin solution in 1x TAE-Mg<sup>2+</sup> for 2 hours at room temperature before dialyzed with 1 mM biotin for 24 hours at 4 °C. The final solution is washed several times with 1x TAE-Mg<sup>2+</sup> to remove excess biotin and concentrated to 30 µL using a 100,000 MWCO membrane.

### 1.7 AFM imaging

A drop of 3 µL DNA solution was spotted onto freshly cleaved mica surface, and kept for 10 s to achieve strong adsorption. 30 µL of 1x TAE-Mg<sup>2+</sup> was added to the mica surface and the tip was pre-wet to prevent drift during imaging. Fluid imaging was performed using nitride probes having a resonance frequency of 21-52 kHz (Olympus -TR400PSA). The tip-surface interaction was minimized by optimizing the scan set-point to the highest possible value. AFM imaging was performed at 22 °C. AFM data was processed with Igor Pro software.

### 1.8 References:

- (1) Chhabra, R.; Sharma, J.; Ke, Y. G.; Liu, Y.; Rinker, S.; Lindsay, S.; Yan, H. *Journal of the American Chemical Society* **2007**, *129*, 10304.
- (2) Rothmund, P. W. K. *Nature* **2006**, *440*, 297.
